# Supplementary material for: Alterations in the Epigenetic Machinery Associated With Prostate Cancer Health Disparities
Source: Preprints.org preprint supplement (doi:10.20944/preprints202305.1875.v1), 2023-05-26
Supplement: Supplementary file 1 [file Cancers_Supp_Tables.xlsx]

## Sheet: TableS1_patient_summary
Table S1 Patient summary for African and European study participants.
Variables	Total (n = 158)	African ancestry (n = 105)	European ancestry (n = 53)	p	statistic
Age, n (%)				0.004374	Fisher
0 (45-49)	3 (2)	2 (2)	1 (2)
1 (50-54)	14 (9)	6 (6)	8 (15)
2 (55-59)	22 (14)	11 (11)	11 (21)
3 (60-64)	33 (21)	18 (17)	15 (28)
4 (65-69)	42 (27)	28 (27)	14 (26)
5 (70-74)	28 (18)	24 (23)	4 (8)
6 (75-79)	11 (7)	11 (11)	0 (0)
7 (80-85)	1 (1)	1 (1)	0 (0)
8 (85-89)	2 (1)	2 (2)	0 (0)
9 (95-99)	1 (1)	1 (1)	0 (0)
ISUP, n (%)				0.000116	Fisher
1	15 (10)	8 (8)	7 (13)
2	10 (6)	10 (10)	0 (0)
3	11 (7)	10 (10)	1 (2)
4	46 (30)	37 (37)	9 (17)
5	72 (47)	36 (36)	36 (68)
GMS, n (%)				6.2e-05	Fisher
A	108 (68)	68 (65)	40 (75)
B	21 (13)	21 (20)	0 (0)
C	21 (13)	9 (9)	12 (23)
D	8 (5)	7 (7)	1 (2)
Somatic SNVs (in epigenetic machinery genes), Median (Q1,Q3)	2 (1, 3)	2 (1, 3)	2 (1, 3)	0.318414	0.995
Somatic indels (in epigenetic machinery genes), Median (Q1,Q3)	0 (0, 1)	0 (0, 1)	0 (0, 1)	0.908868	0.013
TMB per Mb (in epigenetic machinery genes), Median (Q1,Q3)	1.2984 (1.2984, 1.9476)	1.2984 (0.6492, 1.9476)	1.9476 (1.2984, 1.9476)	0.193612	1.69
TMB per Mb (whole genome), Median (Q1,Q3)	1.1833 (0.5231, 1.5643)	1.2312 (0.6043, 1.8446)	1.1049 (0.1979, 1.3536)	0.012793	6.197
Epigenetic cancer subtype, n (%)				4.2e-05	20.174
ECS1	71 (45)	36 (34)	35 (66)
ECS2	45 (28)	41 (39)	4 (8)
ECS3	42 (27)	28 (27)	14 (26)

## Sheet: TableS2_PathCards
Table S2 SuperPaths and their associated pathways included in this study for relation to epigenetic processes, identified using the PathCards database.
SuperPath	Associated Pathway(s)
Chromatin organisation
	Chromatin modifying enzymes
	HATs acetylate histones
Chromatin regulation/acetylation
PKMTs methylate histone lysines
	Histone modifications
Signalling events mediated by HDAC Class I
	Transcription SIN3 and NuRD in Transcription regulation
	Signaling events mediated by HDAC Class II
Signalling events mediated by HDAC Class III
Tumour suppressor activity of SMARCB1
RNA polymerase I promoter opening
	TET1, 2, 3 and TDG demethylate DNA
	Epigenetic regulation of gene expression
	DNA methylation
	RMTs methylate Histone argenines
	Positive Epigenetic regulation of rRNA expression
	PRC2 methylates histones and DNA
	Negative Epigenetic regulation of rRNA expression
	HDMs demethylate histones
	HDACs deacetylate histones
Transcriptional regulation by MECP2
	Loss of MECP2 binding ability to 5mC-DNA
Transport of the SLBP independent mature mRNA
	SUMOylation of DNA methylation proteins
	SUMOylation of Chromatin organisation proteins
AMPK enzyme complex
	Chromatin remodelling

## Sheet: TableS3_EPG_1_genes
Table S3 List of genes assigned to Epigenetic Process Group 1 (chromatin organization and regulation).
Gene ID
AAAS
ACD
ACTB
ACTL6A
ACTL6B
AEBP2
AR
ARID1A
ARID1B
ARID2
ARID4A
ARID4B
ARID5B
ASF1A
ASF1B
ASH1L
ASH2L
ATF2
ATF7IP
ATRX
ATXN7
ATXN7L3
BAZ1A
BAZ1B
BMI1
BRD1
BRD2
BRD4
BRD7
BRD8
BRDT
BRMS1
BRPF1
BRPF3
BRWD1
BTAF1
CABIN1
CARM1
CBX1
CBX2
CBX3
CBX4
CBX5
CBX8
CCAR2
CCND1
CCNT1
CDK4
CDK6
CDKN2A
CENPA
CENPI
CENPT
CHAF1A
CHD1
CHD1L
CHD2
CHD3
CHD4
CHD5
CHD7
CHD8
CLOCK
COMMD3-BMI1
COPRS
CREBBP
CTBP1
CTBP2
CTCF
CTR9
CXXC1
CXXC5
DEK
DHX29
DKC1
DMAP1
DNMT1
DNMT3A
DNMT3B
DOT1L
DPF1
DPF2
DPF3
DPY30
DR1
DTX3L
EAF2
EED
EHMT1
EHMT2
ELL
ELOA
ELP1
ELP2
ELP3
ELP4
ELP5
ELP6
EMD
ENY2
EP300
EP400
EPC1
ERCC2
ERCC3
ERG
ERI1
EWSR1
EZH1
EZH2
FBL
FUS
GATAD2A
GATAD2B
GLI1
GLI2
GLI3
GLI4
GPS2
GTF2B
GTF2E1
GTF2F1
H1-4
H2AB1
H2AC1
H2AC11
H2AC12
H2AC13
H2AC14
H2AC15
H2AC16
H2AC17
H2AC18
H2AC19
H2AC20
H2AC21
H2AC4
H2AC6
H2AC7
H2AC8
H2AJ
H2AW
H2AX
H2AZ1
H2AZ2
H2BC1
H2BC10
H2BC11
H2BC12
H2BC13
H2BC14
H2BC15
H2BC17
H2BC18
H2BC21
H2BC3
H2BC4
H2BC5
H2BC6
H2BC7
H2BC8
H2BC9
H2BU1
H3-3A
H3-3B
H3C1
H3C10
H3C11
H3C12
H3C13
H3C14
H3C15
H3C2
H3C3
H3C4
H3C6
H3C7
H3C8
H4-16
H4C1
H4C11
H4C12
H4C13
H4C14
H4C15
H4C2
H4C3
H4C4
H4C5
H4C6
H4C8
H4C9
HAT1
HCFC1
HDAC1
HDAC10
HDAC11
HDAC2
HDAC3
HDAC4
HDAC5
HDAC6
HDAC7
HDAC8
HELLS
HEXIM1
HIRA
HJURP
HLTF
HMG20B
HMGA1
HMGA2
HMGB1
HMGB2
HMGN1
HMGN2
HNRNPA0
HNRNPA2B1
HNRNPC
HOXB13
HOXD9
IGF2BP3
ING1
ING3
ING4
ING5
INTS9
JADE1
JADE2
JADE3
JAK2
JARID2
JMJD6
KANSL1
KANSL2
KANSL3
KAT14
KAT2A
KAT2B
KAT5
KAT6A
KAT6B
KAT7
KAT8
KDM1A
KDM1B
KDM2A
KDM2B
KDM3A
KDM3B
KDM4A
KDM4B
KDM4C
KDM4D
KDM5A
KDM5B
KDM5C
KDM5D
KDM6A
KDM6B
KDM7A
KMT2A
KMT2B
KMT2C
KMT2D
KMT2E
KMT5A
KMT5B
KMT5C
L3MBTL2
MACROH2A1
MBD3
MBIP
MCRS1
MEAF6
MECOM
MECP2
MED1
MED12
MED26
MEN1
METTL14
METTL3
MEX3C
MGMT
MLLT1
MLX
MORF4L1
MORF4L2
MRGBP
MSL1
MSL2
MSL3
MTA1
MTA2
MTA3
NAA10
NCAPD3
NCL
NCOA1
NCOA2
NCOA3
NCOR1
NCOR2
NDC1
NELFB
NELFCD
NFKB1
NFKB2
NR3C1
NSD1
NSD2
NSD3
NUP107
NUP133
NUP153
NUP155
NUP160
NUP188
NUP205
NUP210
NUP214
NUP35
NUP37
NUP42
NUP43
NUP50
NUP54
NUP58
NUP62
NUP85
NUP88
NUP93
NUP98
NUTM1
OGT
PADI1
PADI2
PADI3
PADI4
PADI6
PAF1
PARG
PAX3
PBRM1
PCGF2
PELP1
PHC1
PHC2
PHC3
PHF19
PHF2
PHF20
PHF21A
PHF8
PIAS1
PIAS2
POLR1A
POLR2A
POLR3A
POM121
PRDM16
PRDM9
PRMT1
PRMT3
PRMT5
PRMT6
PRMT7
PSIP1
PTCH1
RAD21
RAE1
RANBP2
RB1
RBBP4
RBBP5
RBBP7
RBL2
RBMX
RCOR1
RELA
REST
RING1
RIOX1
RIOX2
RNF2
RNF20
RNF40
RPS2
RRP8
RTF1
RUVBL1
RUVBL2
RYBP
SAP130
SAP18
SAP30
SAP30L
SATB1
SATB2
SCMH1
SEC13
SEH1L
SETD1A
SETD1B
SETD2
SETD3
SETD6
SETD7
SETDB1
SETDB2
SGF29
SIN3A
SIRT1
SIRT2
SIRT3
SIRT5
SIRT6
SIRT7
SMARCA1
SMARCA2
SMARCA4
SMARCA5
SMARCAD1
SMARCB1
SMARCC1
SMARCC2
SMARCD1
SMARCD2
SMARCD3
SMARCE1
SMC1A
SMC2
SMC3
SMC4
SMO
SMYD2
SMYD3
SP1
SS18
SSRP1
SSU72
STAG2
SUDS3
SUMO1
SUMO2
SUMO3
SUPT16H
SUPT20H
SUPT3H
SUPT4H1
SUPT5H
SUPT6H
SUPT7L
SUV39H1
SUV39H2
SUZ12
TADA1
TADA2A
TADA2B
TADA3
TAF1
TAF10
TAF12
TAF15
TAF5L
TAF6L
TAF9
TBL1X
TBL1XR1
TBP
TDRD3
TERF2IP
TET2
TFAM
TIAL1
TMPO
TOP2A
TPR
TRIM28
TRIM33
TRIM37
TRRAP
TUBA1B
TYMP
UBE2I
UHRF1
USP22
UTY
VIRMA
VPS72
WAPL
WDR5
WDR77
WDR82
WTAP
XPO1
YEATS2
YEATS4
YTHDC1
ZBED1
ZZZ3
AIRE
ARID3
ASXL1
ASXL2
ASXL3
BPTF
BRWD3
CHD6
HR
JAK1
KMT1D
KMT3A
KMT4
LBR
MBD5
MORC2
MSH6
ORC1
PHF6
BRWD2
PRDM12
PRDM5
RAG2
RAI1
RERE
SP110
SRCAP
ZMYND11

## Sheet: TableS4_EPG_2_genes
Table S4 List of genes assigned to Epigenetic Process Group 2 (histone modifications).
Gene ID
ACTL6A
ACTL6B
AEBP2
ARID1A
ARID1B
ARID2
ARID4A
ARID4B
ARID5B
ASH1L
ASH2L
ATF7IP
BRMS1
CARM1
CCND1
CDK4
CHD3
CHD4
COPRS
DNMT1
DNMT3A
DNMT3B
DOT1L
DPY30
EED
EHMT1
EHMT2
EZH1
EZH2
GATAD2A
GATAD2B
GPS2
H2AB1
H2AC1
H2AC11
H2AC12
H2AC13
H2AC14
H2AC15
H2AC16
H2AC17
H2AC18
H2AC19
H2AC20
H2AC21
H2AC4
H2AC6
H2AC7
H2AC8
H2AJ
H2AW
H2AX
H2AZ1
H2AZ2
H2BC1
H2BC10
H2BC11
H2BC12
H2BC13
H2BC14
H2BC15
H2BC17
H2BC18
H2BC21
H2BC3
H2BC4
H2BC5
H2BC6
H2BC7
H2BC8
H2BC9
H2BU1
H3-3A
H3-3B
H3C1
H3C10
H3C11
H3C12
H3C13
H3C14
H3C15
H3C2
H3C3
H3C4
H3C6
H3C7
H3C8
H4-16
H4C1
H4C11
H4C12
H4C13
H4C14
H4C15
H4C2
H4C3
H4C4
H4C5
H4C6
H4C7
H4C8
H4C9
HDAC1
HDAC10
HDAC2
HDAC3
HDAC8
HMG20B
JAK2
JARID2
JMJD6
KDM1A
KDM1B
KDM2A
KDM2B
KDM3A
KDM3B
KDM4A
KDM4B
KDM4C
KDM4D
KDM5A
KDM5B
KDM5C
KDM5D
KDM6A
KDM6B
KDM7A
KMT2A
KMT2B
KMT2C
KMT2D
KMT2E
KMT5A
KMT5B
KMT5C
LOC102724334
MBD3
MECOM
MTA1
MTA2
MTA3
MTF2
NCOR1
NCOR2
NFKB1
NFKB2
NSD1
NSD2
NSD3
PBRM1
PHF1
PHF19
PHF2
PHF21A
PHF8
PRDM16
PRDM2
PRDM9
PRMT1
PRMT3
PRMT5
PRMT6
PRMT7
RBBP4
RBBP5
RBBP7
RCOR1
RELA
REST
RIOX2
RPS2
SAP18
SAP30
SAP30L
SET
SETBP1
SETD1A
SETD1B
SETD2
SETD3
SETD4
SETD5
SETD6
SETD7
SETD9
SETDB1
SETDB2
SETMAR
SMARCA2
SMARCA4
SMARCB1
SMARCC1
SMARCC2
SMARCD1
SMARCD2
SMARCD3
SMARCE1
SMYD1
SMYD2
SMYD3
SMYD4
SMYD5
SUDS3
SUV39H1
SUV39H2
SUZ12
TBL1X
TBL1XR1
UTY
WDR5
WDR77
KAT6B
EP300
HDAC4
HDAC6
BRD2
BRD3
BRD4
UHRF1
AIRE
ASXL1
ASXL2
ASXL3
BPTF
BRWD3
HR
JAK1
KMT1D
KMT3A
KMT4
MBD5
MORC2
PHF6
PRDM12
PRDM5
RAG2
RERE
SRCAP
ZMYND11

## Sheet: TableS5_EPG_3_genes
Table S5 List of genes assigned to Epigenetic Process Group 3 (DNA methylation).
Gene ID
AEBP2
BMI1
CBX2
CBX4
CBX8
COMMD3-BMI1
DNMT1
DNMT3A
DNMT3B
DNMT3L
EED
EZH2
H2AB1
H2AC14
H2AC18
H2AC19
H2AC20
H2AC4
H2AC6
H2AC7
H2AC8
H2AJ
H2AX
H2AZ1
H2AZ2
H2BC1
H2BC10
H2BC11
H2BC12
H2BC13
H2BC14
H2BC15
H2BC17
H2BC21
H2BC3
H2BC4
H2BC5
H2BC6
H2BC7
H2BC8
H2BC9
H2BU1
H3-3A
H3-3B
H3C1
H3C10
H3C11
H3C12
H3C13
H3C14
H3C15
H3C2
H3C3
H3C4
H3C6
H3C7
H3C8
H4-16
H4C1
H4C11
H4C12
H4C13
H4C14
H4C15
H4C2
H4C3
H4C4
H4C5
H4C6
H4C8
H4C9
JARID2
LOC102724334
MTF2
PCGF2
PHC1
PHC2
PHC3
PHF1
PHF19
RBBP4
RBBP7
RING1
RNF2
SCMH1
SUMO1
SUZ12
TDG
TET1
TET2
TET3
UBE2I
UHRF1
IDH1
IDH2
MBD1
MBD2
MECP2
ZBTB33
ALKBH3
MBD5

## Sheet: TableS6_EPG_4_genes
Table S6 List of genes assigned to Epigenetic Process Group 4 (RNA regulation).
Gene ID
ACTB
ARID4B
BAZ1B
BAZ2A
CBX3
CCNH
CDK7
CHD3
CHD4
DDX21
DEK
DNMT1
DNMT3B
EHMT2
EP300
ERCC2
ERCC3
ERCC6
GATAD2A
GATAD2B
GSK3B
GTF2H1
GTF2H2
GTF2H3
GTF2H4
GTF2H5
H2AB1
H2AC14
H2AC18
H2AC19
H2AC20
H2AC4
H2AC6
H2AC7
H2AC8
H2AJ
H2AX
H2AZ1
H2AZ2
H2BC1
H2BC10
H2BC11
H2BC12
H2BC13
H2BC14
H2BC15
H2BC17
H2BC21
H2BC3
H2BC4
H2BC5
H2BC6
H2BC7
H2BC8
H2BC9
H2BU1
H3-3A
H3-3B
H3C1
H3C10
H3C11
H3C12
H3C13
H3C14
H3C15
H3C2
H3C3
H3C4
H3C6
H3C7
H3C8
H4-16
H4C1
H4C11
H4C12
H4C13
H4C14
H4C15
H4C2
H4C3
H4C4
H4C5
H4C6
H4C8
H4C9
HDAC1
HDAC2
KAT2A
KAT2B
LOC102724334
MBD2
MBD3
MNAT1
MTA1
MTA2
MTA3
MYBBP1A
MYO1C
POLR1A
POLR1B
POLR1C
POLR1D
POLR1E
POLR1F
POLR1G
POLR1H
POLR2E
POLR2F
POLR2H
POLR2K
POLR2L
RBBP4
RBBP7
RRP8
SAP130
SAP18
SAP30
SAP30BP
SAP30L
SF3B1
SIN3A
SIN3B
SIRT1
SMARCA5
SUDS3
SUV39H1
TAF1A
TAF1B
TAF1C
TAF1D
TBP
TTF1
UBTF
ALG13
SMN1
TDRD7

## Sheet: TableS7_EPG_5_genes
Table S7 List of genes assigned to Epigenetic Process Group 5 (epigenetic regulation of gene expression).
Gene ID
ACSS1
ACSS2
ACTB
AEBP2
ANKRA2
ARID4A
ARID4B
BAX
BAZ1B
BAZ2A
BCL6
BCOR
BTRC
CAMK2A
CAMK4
CBX3
CCNH
CDK7
CDKN1A
CHD3
CHD4
CREBBP
DDX21
DEK
DNMT1
DNMT3A
DNMT3B
DNMT3L
EED
EHMT2
EP300
ERCC2
ERCC3
ERCC6
ESR1
EZH2
FHL2
FKBP3
FOXO1
FOXO3
FOXO4
GATA1
GATA2
GATAD2A
GATAD2B
GNB1
GNG2
GRK2
GSK3B
GTF2H1
GTF2H2
GTF2H3
GTF2H4
GTF2H5
H1-4
H2AB1
H2AC14
H2AC18
H2AC19
H2AC20
H2AC4
H2AC6
H2AC7
H2AC8
H2AJ
H2AX
H2AZ1
H2AZ2
H2BC1
H2BC10
H2BC11
H2BC12
H2BC13
H2BC14
H2BC15
H2BC17
H2BC21
H2BC3
H2BC4
H2BC5
H2BC6
H2BC7
H2BC8
H2BC9
H2BU1
H3-3A
H3-3B
H3-4
H3C1
H3C10
H3C11
H3C12
H3C13
H3C14
H3C15
H3C2
H3C3
H3C4
H3C6
H3C7
H3C8
H4-16
H4C1
H4C11
H4C12
H4C13
H4C14
H4C15
H4C2
H4C3
H4C4
H4C5
H4C6
H4C8
H4C9
HDAC1
HDAC10
HDAC11
HDAC2
HDAC3
HDAC4
HDAC5
HDAC6
HDAC7
HDAC8
HDAC9
HOXA10
HSP90AA1
JARID2
KAT2A
KAT2B
LOC102724334
MAX
MBD2
MBD3
MBD3L2
MEF2C
MEF2D
MNAT1
MTA1
MTA2
MTA3
MTF2
MXD1
MYBBP1A
MYO1C
MYOD1
NCOR1
NCOR2
NFKB1
NFKBIA
NONO
NR2C1
NR3C1
NUP153
NUP210
NUP214
NUP62
PHF1
PHF19
POLR1A
POLR1B
POLR1C
POLR1D
POLR1E
POLR1F
POLR1G
POLR1H
POLR2E
POLR2F
POLR2H
POLR2K
POLR2L
PPARA
PPARG
PPARGC1A
PRKACA
PRMT5
RAN
RANBP2
RANGAP1
RARA
RARB
RBBP4
RBBP7
RELA
REST
RFXANK
RRP8
RXRA
RXRB
SAP130
SAP18
SAP30
SAP30BP
SAP30L
SF3B1
SFPQ
SIN3A
SIN3B
SIRT1
SIRT2
SIRT3
SIRT7
SMAD7
SMARCA5
SMG5
SMURF1
SRF
STAT3
SUDS3
SUMO1
SUV39H1
SUZ12
TAF1A
TAF1B
TAF1C
TAF1D
TBP
TDG
TET1
TET2
TET3
TFCP2
THRA
TNF
TNFRSF1A
TP53
TTF1
TUBA1B
TUBB2A
UBE2I
UBTF
UHRF1
WDR77
XPO1
XRCC6
YWHAB
YWHAE
YY1
ZFPM1
AIRE
ALG13
ARID3
ASXL1
ASXL2
ASXL3
BPTF
MORC2
PHF6
SP110
SRCAP
ZMYND11

## Sheet: TableS8_MOVICS
Table S8 MOVICS clustering results.
Sample ID	Ethnicity	MOVICS_Cancer_Subtype
10651-T	European	ECS2
10734-T	European	ECS1
10738-1042949-T	European	ECS1
10764-T	European	ECS3
11099-T	European	ECS1
11114-T	European	ECS3
11119-T	European	ECS1
11129-T	European	ECS3
11141-T	European	ECS3
11452-1056021-T	European	ECS1
11590-T	European	ECS1
11830-T	European	ECS3
11926-T	European	ECS1
12103-T	European	ECS1
12543-1081384-T	European	ECS1
12571-T	European	ECS1
12596-T	European	ECS3
13019-T	European	ECS1
13104-1095757-T	European	ECS1
13179-1096899-T	European	ECS2
13518-T	European	ECS1
14261-T	European	ECS3
14365-T	European	ECS3
14862-T	European	ECS3
14919-T	European	ECS1
15126-T	European	ECS3
15178-T	European	ECS1
15917-1147612-T	European	ECS1
16000-T	European	ECS1
16004-T	European	ECS3
16176-T	European	ECS1
16263-T	European	ECS1
16311-T	European	ECS3
16599-T	European	ECS1
16677-T	European	ECS1
16995-T	European	ECS1
17135-T	European	ECS1
17212-T	European	ECS3
17392-T	European	ECS1
17827-T	European	ECS1
18210-T	European	ECS1
5060-1034766-T	European	ECS1
5287-1079625-T	European	ECS1
5545-1079775-T	European	ECS1
5656-1034950-T	European	ECS1
5684-1079906-T	European	ECS2
5902-1035059-T	European	ECS1
5958-1040497-T	European	ECS1
6068-T	European	ECS1
6359-1050886-T	European	ECS1
KAL0004-T	African	ECS1
KAL0013-T	African	ECS2
KAL0022-T	African	ECS1
KAL0043-T	African	ECS2
KAL0054-T	African	ECS1
KAL0072-T	African	ECS1
KAL0074-T	African	ECS1
KAL0078-T	African	ECS1
KAL0091-T	African	ECS1
KAL0101-T	African	ECS1
KAL0104-T	European	ECS1
KAL0106-T	African	ECS1
KAL053-T	African	ECS2
KAL070-T	African	ECS2
N0001-T	African	ECS1
N0002-T	African	ECS2
N0007-T	African	ECS1
N0010-T	African	ECS1
N0015-T	African	ECS2
N0048-T	African	ECS1
N0053-T	African	ECS2
N0056-T	African	ECS3
N0059-T	African	ECS3
N0061-T	African	ECS1
N0067-T	African	ECS3
N0077-T	African	ECS1
N0078-T	African	ECS3
N0081-T	African	ECS2
N0084-T	African	ECS2
N0085-T	African	ECS1
N0087-T	European	ECS3
N0088-T	African	ECS3
SMU019-T	African	ECS3
SMU027-T	African	ECS3
SMU029-T	African	ECS3
SMU030-T	African	ECS3
SMU032-T	African	ECS3
SMU039-T	African	ECS2
SMU041-T	African	ECS2
SMU050-T	African	ECS3
SMU061-T	African	ECS3
SMU062-T	African	ECS1
SMU064-T	African	ECS1
SMU068-T	African	ECS2
SMU076-T	African	ECS1
SMU079-T	African	ECS3
SMU080-T	African	ECS2
SMU083-T	African	ECS2
SMU087-T	African	ECS2
SMU089-T	African	ECS1
SMU091-T	African	ECS1
SMU094-T	African	ECS3
SMU097-T	African	ECS3
SMU098-T	African	ECS3
SMU100-T	African	ECS1
SMU101-T	African	ECS1
SMU104-T	African	ECS3
SMU106-T	African	ECS3
SMU107-T	African	ECS3
SMU109-T	African	ECS2
SMU132-T	African	ECS3
SMU141-T	African	ECS2
SMU142-T	African	ECS2
SMU157-T	African	ECS2
SMU159-T	African	ECS2
SMU161-T	African	ECS2
SMU167-T	African	ECS3
SMU177-T	African	ECS2
SMU183-T	African	ECS1
SMU195-T	African	ECS3
SMU196-T	African	ECS3
SMU200-T	African	ECS3
TSH003-T	African	ECS3
TSH005-T	African	ECS3
TSH008-T	African	ECS3
UP2003-T	African	ECS2
UP2004-T	African	ECS1
UP2035-T	African	ECS1
UP2039-T	African	ECS3
UP2048-T	African	ECS1
UP2049-T	African	ECS1
UP2050-T	African	ECS2
UP2089-T	African	ECS2
UP2093-T	African	ECS2
UP2099-T	African	ECS2
UP2100-T	African	ECS2
UP2101-T	African	ECS2
UP2103-T	African	ECS2
UP2109-T	African	ECS1
UP2115-T	African	ECS1
UP2116-T	African	ECS2
UP2117-T	African	ECS2
UP2119-T	African	ECS1
UP2133-T	African	ECS2
UP2142-T	African	ECS2
UP2153-T	European	ECS2
UP2159-T	African	ECS2
UP2187-T	African	ECS2
UP2197-T	African	ECS1
UP2213-T	African	ECS2
UP2267-T	African	ECS1
UP2317-T	African	ECS1
UP2351-T	African	ECS2
UP2360-T	African	ECS1
UP2370-T	African	ECS2
UP2372-T	African	ECS1
UP2380-T	African	ECS2
UP2396-T	African	ECS2

## Sheet: TableS9_TMB_all_vars
Table S9 Statistical summary for tumour mutational burden (per Mb) based on all coding variants in epigenetic machinery genes in African and European derived tumors.
		n	min	max	median	iqr	mean	sd	se	ci	p	statistic*
Whole genome
	African	105	0.042	15.7	1.23	1.24	1.46	1.72	0.168	0.333	0.01286	3458.5
	European	53	0.021	2.38	1.10	1.16	0.94	0.634	0.087	0.175
All EPGs
	African	77	0.649	21.4	1.30	1.30	1.84	2.45	0.28	0.557	0.1948	1078
	European	33	0.649	3.90	1.95	0.649	1.69	0.706	0.123	0.25
EPG 1
	African	66	0.756	19.7	1.51	1.51	1.87	2.42	0.298	0.594	0.5941	1123
	European	32	0.756	3.02	1.51	0.756	1.42	0.658	0.116	0.237
EPG 2
	African	44	1.63	24.5	1.63	1.63	3.22	3.58	0.54	1.09	0.9382	467.5
	European	21	1.63	6.52	3.26	1.63	2.64	1.21	0.263	0.549
EPG 3
	African	9	8.91	8.91	8.91	0	8.91	0	0	0	NA	18
	European	4	8.91	8.91	8.91	0	8.91	0	0	0
EPG 4
	African	20	5.42	16.3	5.42	1.36	7.05	3.10	0.693	1.45	0.6784	65.5
	European	6	5.42	10.8	5.42	0	6.33	2.21	0.904	2.32
EPG 5
	African	41	2.18	21.8	2.18	2.18	3.46	3.2	0.5	1.01	0.7843	354.5
	European	18	2.18	8.73	2.18	2.18	3.28	1.72	0.404	0.853
*Wilcoxon rank sum test with continuity correction

## Sheet: TableS10_TMB_dam_vars
Table S10 Statistical summary for tumour mutational burden (per Mb) based only on damaging variants (as per functional impact prediction) in epigenetic machinery genes in African and European derived tumors.
		n	min	max	median	iqr	mean	sd	se	ci	p	statistic*
EPG 1
	African	37	0.756	11.3	0.756	0.756	1.45	1.81	0.298	0.604	0.08275	497
	European	22	0.756	1.51	0.756	0	0.894	0.298	0.064	0.132
EPG 2
	African	21	1.63	14.7	1.63	0	2.72	3.02	0.66	1.38	0.3844	141
	European	12	1.63	3.26	1.63	0	1.77	0.471	0.136	0.299
EPG 3
	African	5	8.91	8.91	8.91	0	8.91	0	0	0	NA	7.5
	European	3	8.91	8.91	8.91	0	8.91	0	0	0
EPG 4
	African	9	5.42	16.3	5.42	0	7.23	3.83	1.28	2.95	1	18
	European	4	5.42	10.8	5.42	1.36	6.78	2.71	1.36	4.31
EPG 5
	African	23	2.18	13.1	2.18	0	2.94	2.43	0.506	1.05	0.9563	148
	European	13	2.18	4.37	2.18	0	2.52	0.82	0.227	0.495
*Wilcoxon rank sum test with continuity correction

[truncated: 5 more sheets: TableS11_mut_freq, TableS12_SV_freq, TableS13_clust_summ_ECS, TableS14_iClusterBayes_top_feat, TableS15_clust_summ_EcnCS]
