# Supplementary material for: Alterations in the Epigenetic Machinery Associated With Prostate Cancer Health Disparities
Source: Preprints.org preprint supplement (doi:10.20944/preprints202305.1875.v1), 2023-05-26
Supplement: Supplementary file 3 [file supplementary]

Archive with 4 entries (4 files):
- Cancers_Supp_Figures.pdf
- __MACOSX/._Cancers_Supp_Figures.pdf
- Cancers_Supp_Tables.xlsx
- __MACOSX/._Cancers_Supp_Tables.xlsx
